# Supplementary material for: Assessing the Pathogenicity of <i>Berkeleyomyces rouxiae</i> and <i>Fusarium oxysporum</i> f. sp. <i>vasinfectum</i> on Cotton (<i>Gossypium hirsutum</i>) Using a Rapid and Robust Seedling Screening Method
Source: Preprints.org preprint supplement (doi:10.20944/preprints202409.1114.v1), 2024-09-14
Supplement: Supplementary file 1 [file supplementary]

Supplemental material

Assessing the pathogenicity of *Berkeleyomyces rouxiae* and *Fusarium oxysporum* f. sp. *vasinfectum* on cotton (*Gossypium hirsutum*) using a rapid and robust seedling screen method

Andrew Chen 1, *, Duy P. Le 2, Linda J. Smith 3, Dinesh Kafle 3, Elizabeth A. B. Aitken 1, * and Donald M. Gardiner 4, *.

**Table S1**. Primers used for PCR in this study.

| **Primer name** | **5' to 3' sequence** | **Product (bp)** | **PCR1 (C)** | **Reference** |
| --- | --- | --- | --- | --- |
| Cer-MCM7F | ACICGIGTITCIGAYGTNAAGCC | 628 | 55 | de Beer et al. 2014 |
| Cer-MCM7R | TTRGCAACACCAGGRTCACCCAT |  |  |  |
| RPB2-5Fb | GAYGAYCGTGATCACTTYGG | 1129 | 55 | Fourie et al. 2015 |
| RPB2-7Rb | CCCATRGCYTGYTTRCCCAT |  |  |  |
| EF-1-728F | CATCGAGAAGTTCGAGAAGG | ~620 | 52 | Le et al. 2020 |
| EF-2 | GGARGTACCAGTSATCATGTT |  |  | O’Donnell et al. 1998 |
| FovSIX6-F2 | CTTCACGGCAGACCCG | ~467 | 55 | Chakrabarti et al. 2011 |
| SIX6-R1 | CAAGACCAGGTGTAGGCATT |  |  |  |
| SIX1-F | TCTCCATTACTTTGTCTCACG | 694-733 | 55 | Czislowski et al. 2021 |
| SIX1-R | CGATTTAGGCGATTCGGGG |  |  |  |
| SIX2-F | GGTTCCCATCGTTGAAGC | 327-330 | 55 | Czislowski et al. 2021 |
| SIX2-R | TTGGTTTAAATCTGCGTGTC |  |  |  |
| SIX3-F | TTACTACGAGCTTCAGCACC | 223 | 55 | Czislowski et al. 2021 |
| SIX3-R | GCATTAGGTGTTGCAACAGG |  |  |  |
| SIX4-F | CAGCTCAGACAGTCAGCC | ~491 | 55 | Czislowski et al. 2021 |
| SIX4-R | GGCCTTGAGTCGAATGAGC |  |  |  |
| SIX5-F | TCA TCA GTA CTG TGC TTG CC | 347-354 | 55 | Czislowski et al. 2021 |
| SIX5-R | CAT GTT GAG TCT GCT CCT CC |  |  |  |
| SIX6-F | CTCTCGAGACACSCTTCC | 396-399 | 52 | Czislowski et al. 2021 |
| SIX6-R | GATCCACCAATACCTTCAT |  |  |  |
| SIX7-F | GAGGTGACATTTGACATCACC | 113 | 55 | Czislowski et al. 2021 |
| SIX7-R | TAGTATGCGCGCCATTGG |  |  |  |
| SIX8-F | CCCTAGCCGTCTCTGTGGC | 163-165 | 60 | Czislowski et al. 2021 |
| SIX8-R | CGTTCGACAAGGGCTCTCTCG |  |  |  |
| SIX9-G1-F | TTCAAGTCGGTTGCTACGC | 118 | 55 | Czislowski et al. 2021 |
| SIX9-G1-R | GCATCCCAAAATCCAAAGCG |  |  |  |
| SIX10-F | TCACGTTTCGAGTTGGTCC | 202 | 55 | Czislowski et al. 2021 |
| SIX10-R | ACACCAAATCGAGTCGATGC |  |  |  |
| SIX11-F | GTTGCTCCTCCTTTGCTGG | 163 | 56 | Czislowski et al. 2021 |
| SIX11-R | TACCACTCTGACCAGTCACC |  |  |  |
| SIX12-F | CAGAATGCTTGTGTGTGTGG | 171 | 56 | Czislowski et al. 2021 |
| SIX12-R | ATCACCAGAGCATGAACCCC |  |  |  |
| SIX13-F | TCTGATCAGCCTCCTAGCG | 840 | 58 | Czislowski et al. 2021 |
| SIX13-R | CCACTGTAACTCGGCATCGA |  |  |  |
| SIX14-F | TGTCTCAGCGTATCCTCGGC | 147-197 | 58 | Czislowski et al. 2021 |
| SIX14-R | ATTCAGTGACAACGGGACCG |  |  |  |

1 The annealing temperatures used in PCR.

**Table S2**. Spore concentrations of the liquid cultures determined on the day of inoculation.

| **Isolate name** | **Spore conc. (conidia/mL)1** | **Volume (mL)1** | **Spore conc. (conidia/mL)2** | **Volume (mL)2** | **Root dipping (conidia/mL)3** | **Volume (mL)3** |
| --- | --- | --- | --- | --- | --- | --- |
| Fov SG1 | 2.075×107 | 500 | - | - | 2.075×107 | 500 |
| Fov SG26 | 2.7×105 | 500 | - | - | 2.7×105 | 500 |
| Fov SG55 | 3.775×107 | 500 | - | - | 3.775×107 | 500 |
| Fov TH1 | 2.45×107 | 500 | - | - | 2.45×107 | 500 |
| RVB4.1 | 1.245×106 | 200 | 3.55×106 | 45 | 8.175×105 | 500 |
| StrB22 | 1.25×104 | 200 | 2.5×103 | 45 | 5.225×103 | 500 |
| BRR4 | 4.25×104 | 200 | 1.7825×106 | 45 | 1.77425×105 | 500 |
| 22BRR77 | 2.45×106 | 200 | 4.15×106 | 45 | 1.3535×106 | 500 |
| Fo BRF14 | 2.35×107 | 500 | - | - | 2.35×107 | 500 |
| Fo BRF24 | 2.0×107 | 500 | - | - | 2.0×107 | 500 |
| Fo SHF64 | 2.675×107 | 500 | - | - | 2.675×107 | 500 |
| Fo WRF24 | 6.7×106 | 500 | - | - | 6.7×106 | 500 |
| Fov SG14 | 3.375×107 | 500 |  |  | 3.375×107 | 500 |

1 Liquid culture established using half-strength PDB (Fov and Fo) and 10% carrot extract (v/v) in sterile water (*B. rouxiae*). 2 Plate cultures using half-strength PDA (Fov and Fo) and 10% carrot extract (v/v) supplemented with 1.5% agar in sterile water (*B. rouxiae*). Five plates per *B. rouxiae* isolate were flooded with 10mL of sterile water. Spores and mycelia were collected and pooled totaling 45mL per isolate. 3 Spore concentrations of liquid and plate cultures combined in a total volume of 500mL. These cultures were used for root dipping. 4 This experiment was conducted at a later date independently of the first experiment. Both experiments used the same growth chamber and the same set of growth parameters.

**
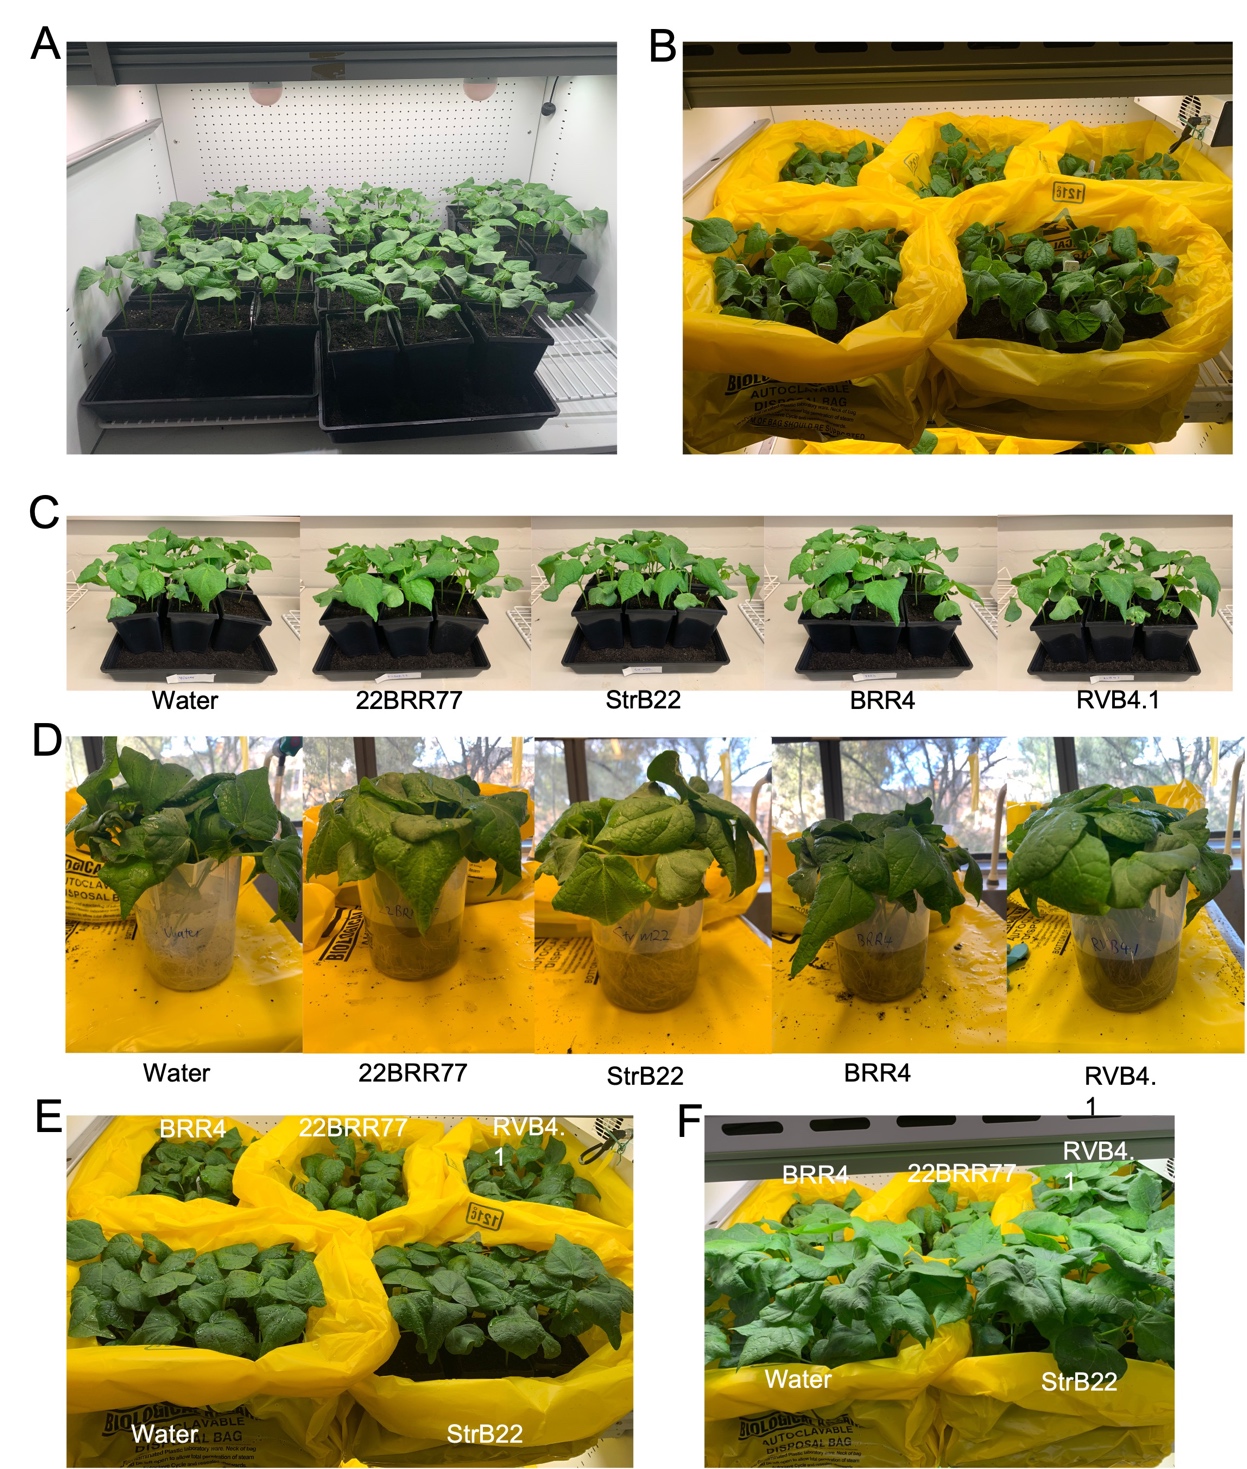
**

**Figure S1.** Plant growth before and after inoculation with *Berkeleyomyces rouxiae* isolates. **(A)** 12 days old Sicot746 B3F seedlings sitting in a double-tier growth chamber. **(B)** 14 days old Sicot746 B3F seedlings immediately after inoculation. **(C)** 14 days old Sicot746 B3F seedlings before inoculation. **(D)** Root dipping was performed using unfiltered cultures. **(E)** Sicot746 B3F seedlings were recovering in the growth chamber at 4 days post inoculation (dpi). **(F)** Sicot746 B3F seedlings were recovering in the growth chamber at 12 dpi.


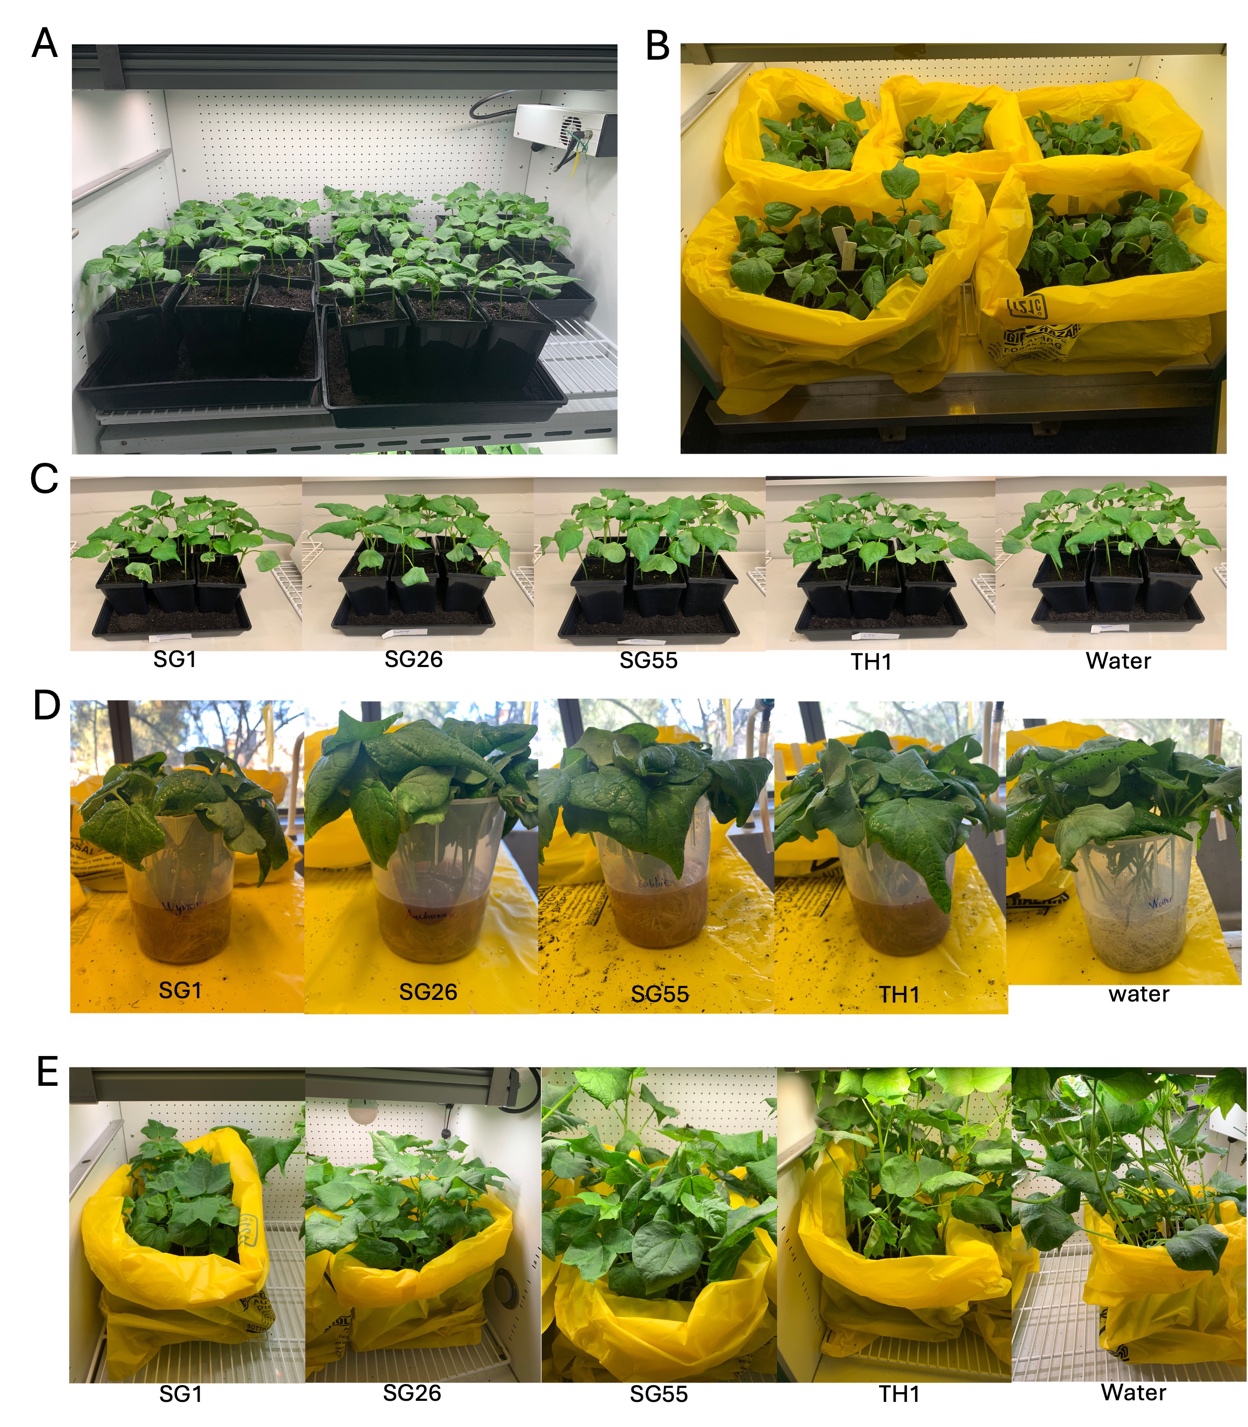


**Figure S2.** Plant growth before and after inoculation with *Fusarium oxysporum* f. sp. *vasinfectum* isolates. **(A)** 12 days old Sicot746 B3F seedlings sitting in a double-tier growth chamber. **(B)** 14 days old Sicot746 B3F seedlings immediately after inoculation. **(C)** 14 days old Sicot746 B3F seedlings before inoculation. **(D)** Root dipping was performed using unfiltered cultures. **(E)** Sicot746 B3F seedlings were recovering in the growth chamber at 19 days post inoculation.


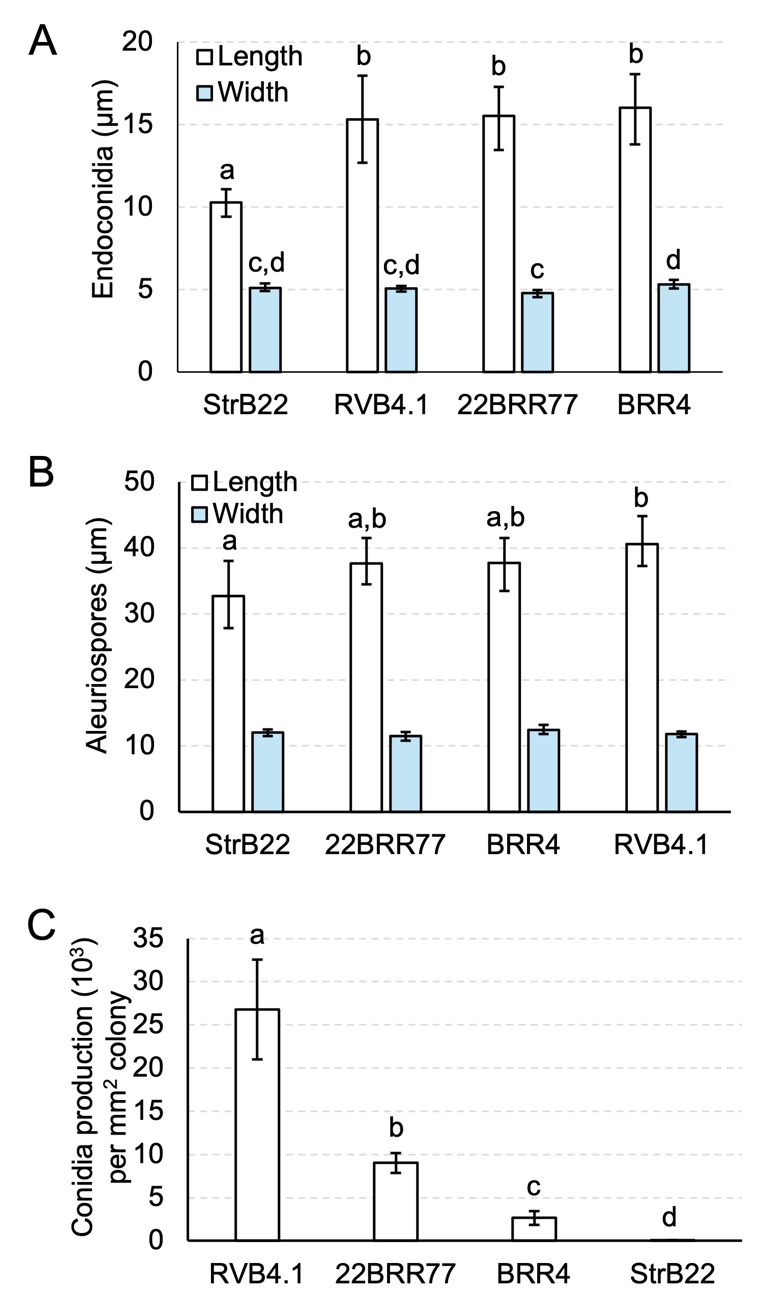


**Figure S3.** The spore size and growth rates of *Berkeleyomyces rouxiae* isolates after 3 weeks of growth on half-strength PDA plates. **(A)** Endoconidia size (n = 12). **(B)** Aleuriospore size (n = 12). **(C)** Growth rates in conidia production per mm2 colony (n = 6). Letters indicate separation of means by Tukey's range test at p = 0.05. Error bars indicate a 95% confidence interval.


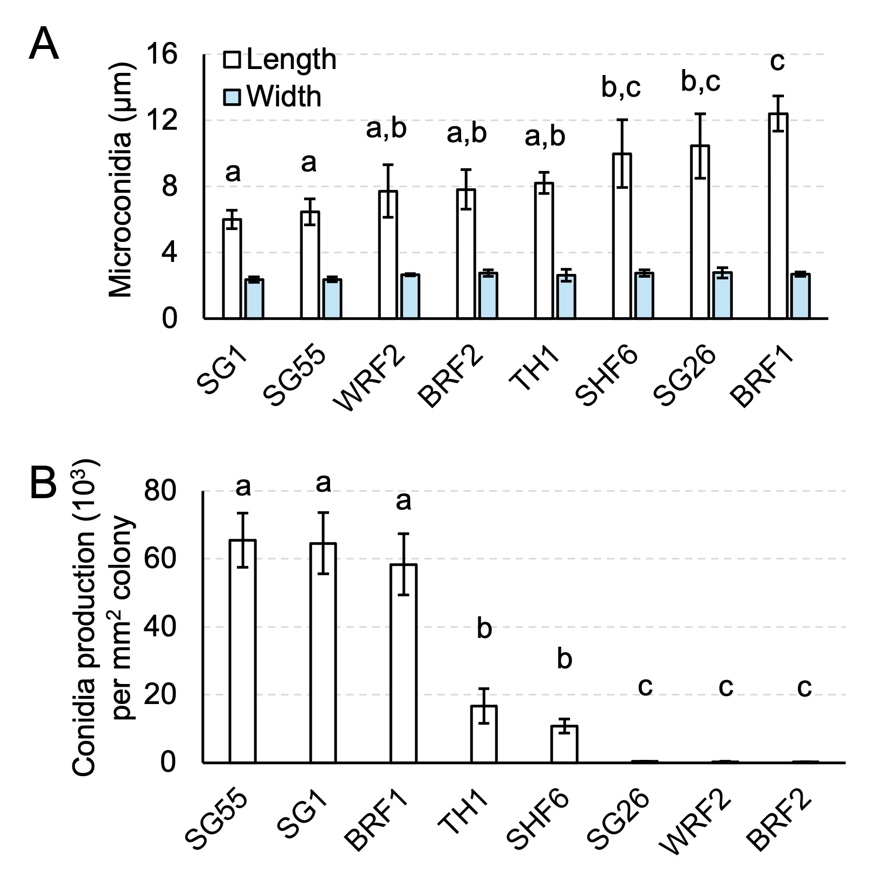


**Figure S4.** The spore size and growth rates of *Fusarium oxysporum* isolates after seven days of growth on half-strength PDA plates. **(A)** Microconidia size (n = 12). **(B)** Growth rates in conidia production per mm2 colony (n = 5). Letters indicate significant separation of means by Tukey's range test at p = 0.05. Error bars indicate a 95% confidence interval.


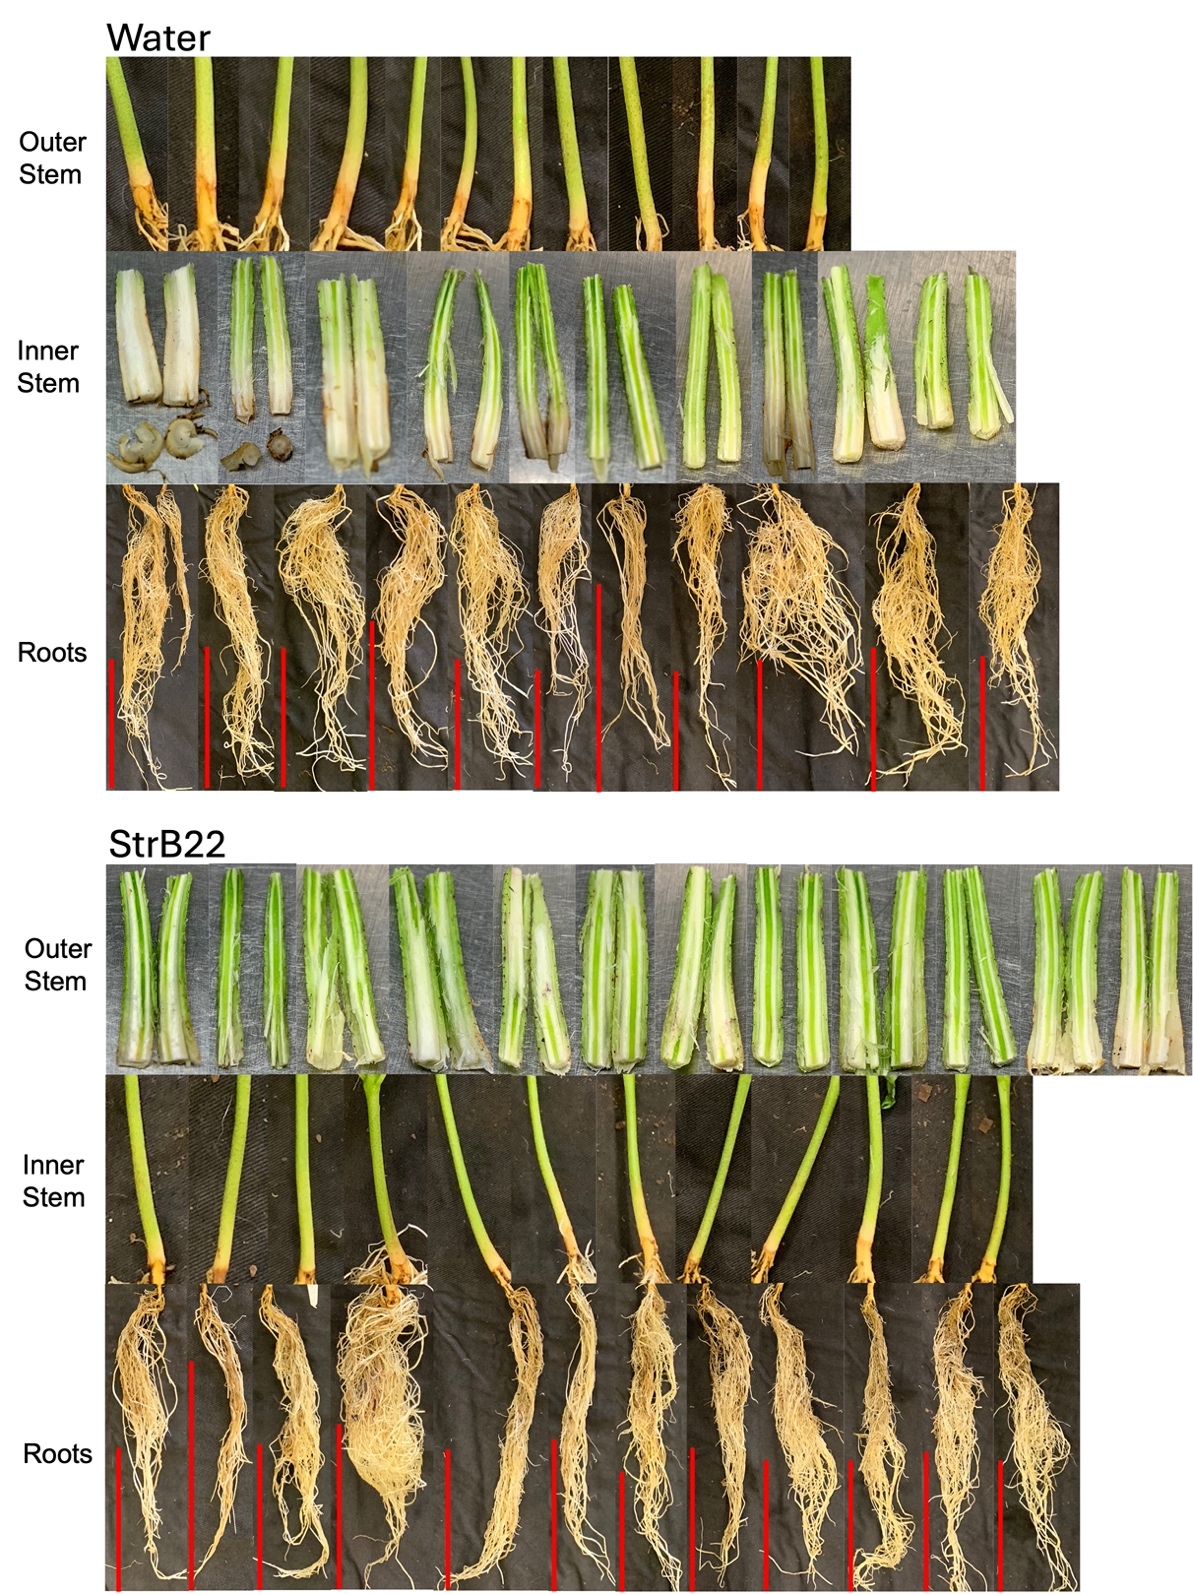


**Figure S5.** Symptomatology of Sicot746 B3F seedlings inoculated with *Berkeleyomyces rouxiae* at harvest (15 — 20 days post inoculation). Uninoculated controls and plants inoculated with StrB22 are shown. Red vertical bars indicate a scale of 10 cm.


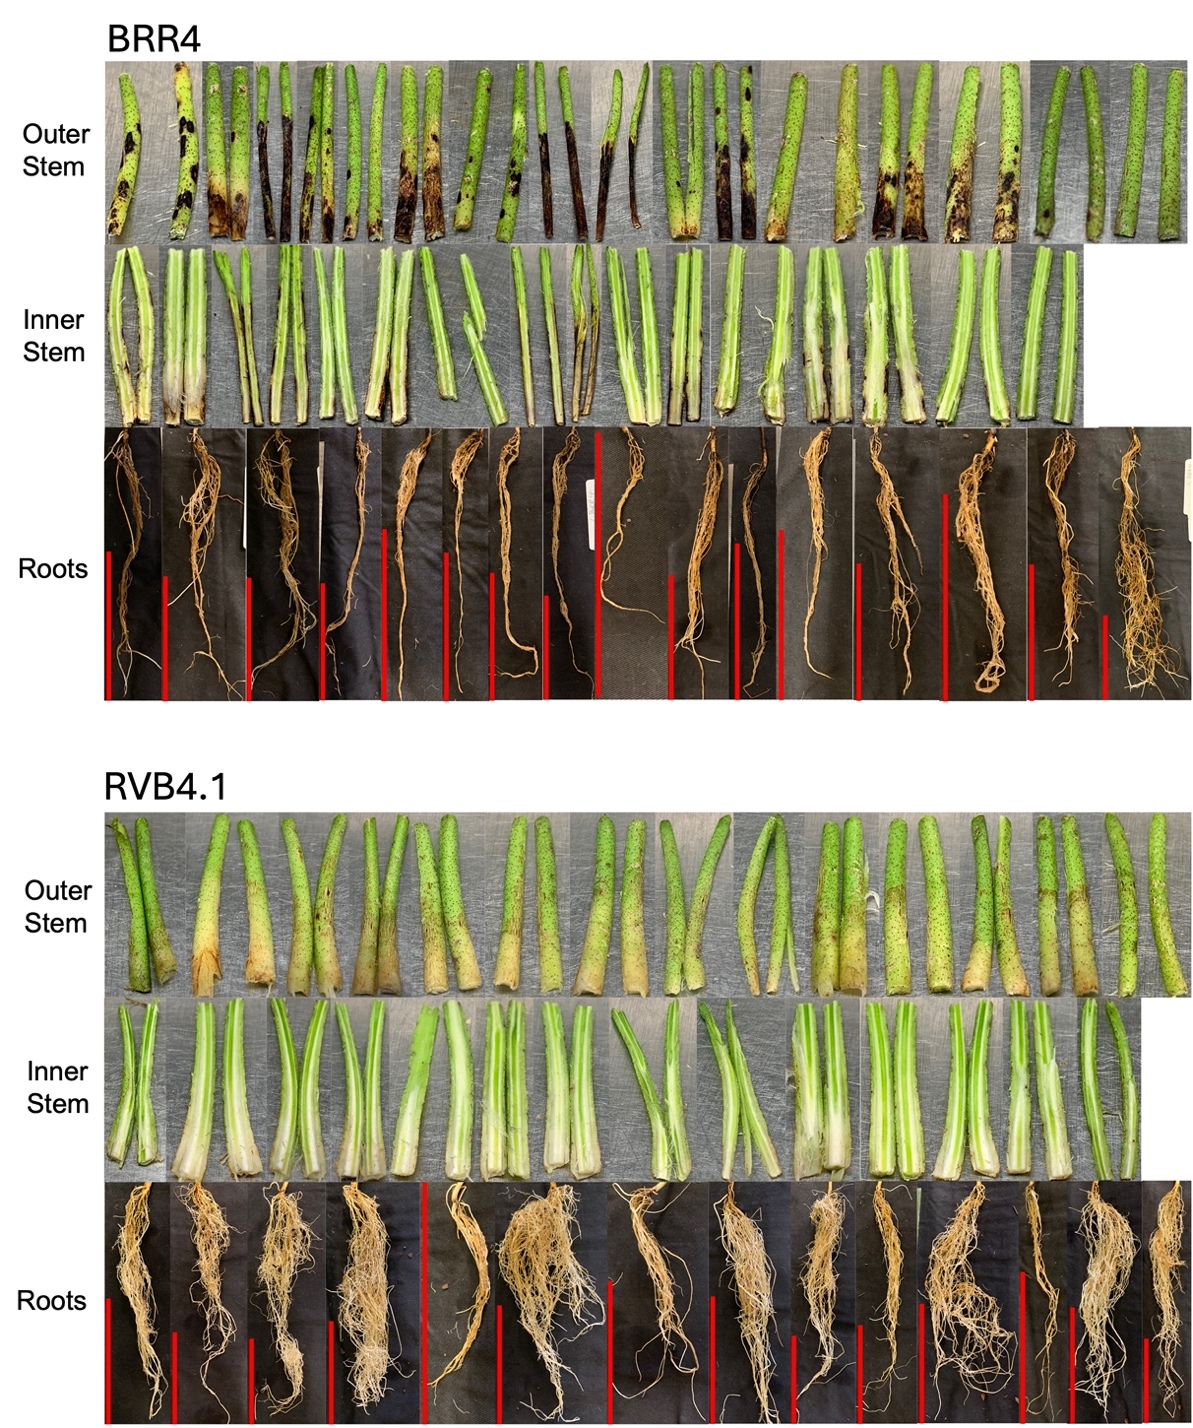


**Figure S6.** Symptomatology of Sicot746 B3F seedlings inoculated with *Berkeleyomyces rouxiae* at harvest (15 — 20 days post inoculation). Plants inoculated with BRR4 and RVB4.1 are shown. Red vertical bars indicate a scale of 10 cm.

**
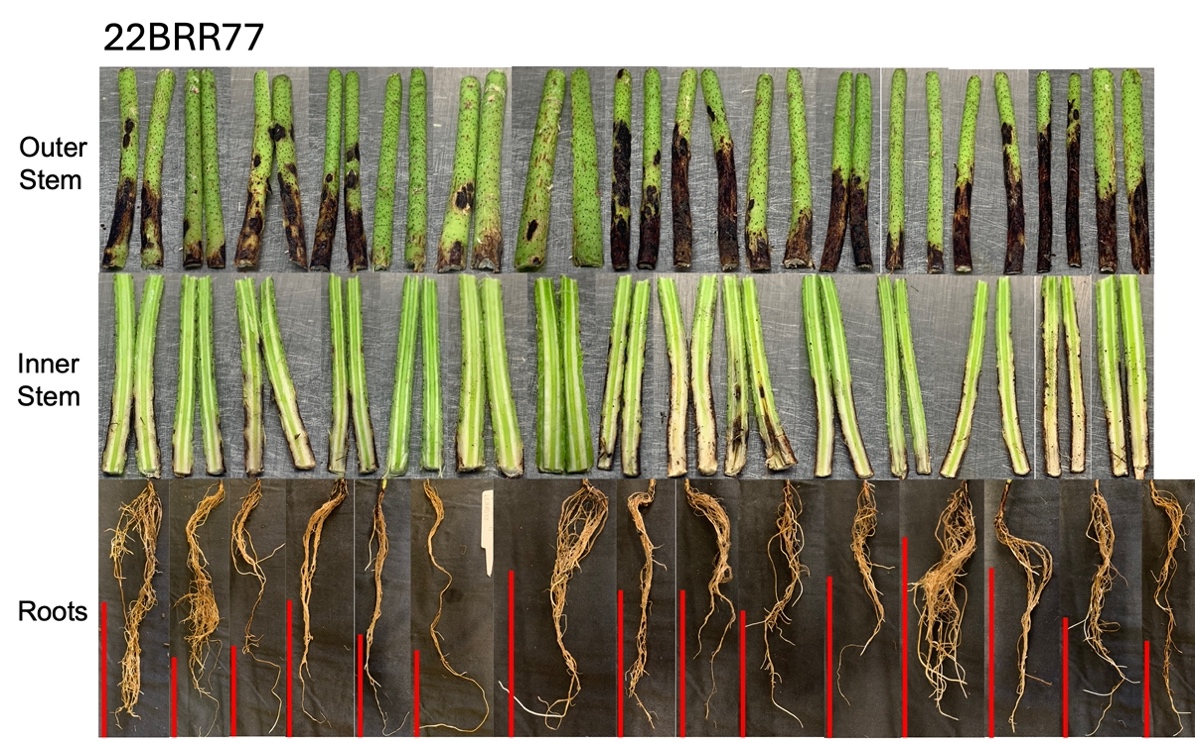
**

**Figure S7.** Symptomatology of Sicot746 B3F seedlings inoculated with *Berkeleyomyces rouxiae* at harvest (15 — 20 days post inoculation). Plants inoculated with 22BRR77 are shown. Red vertical bars indicate a scale of 10 cm.


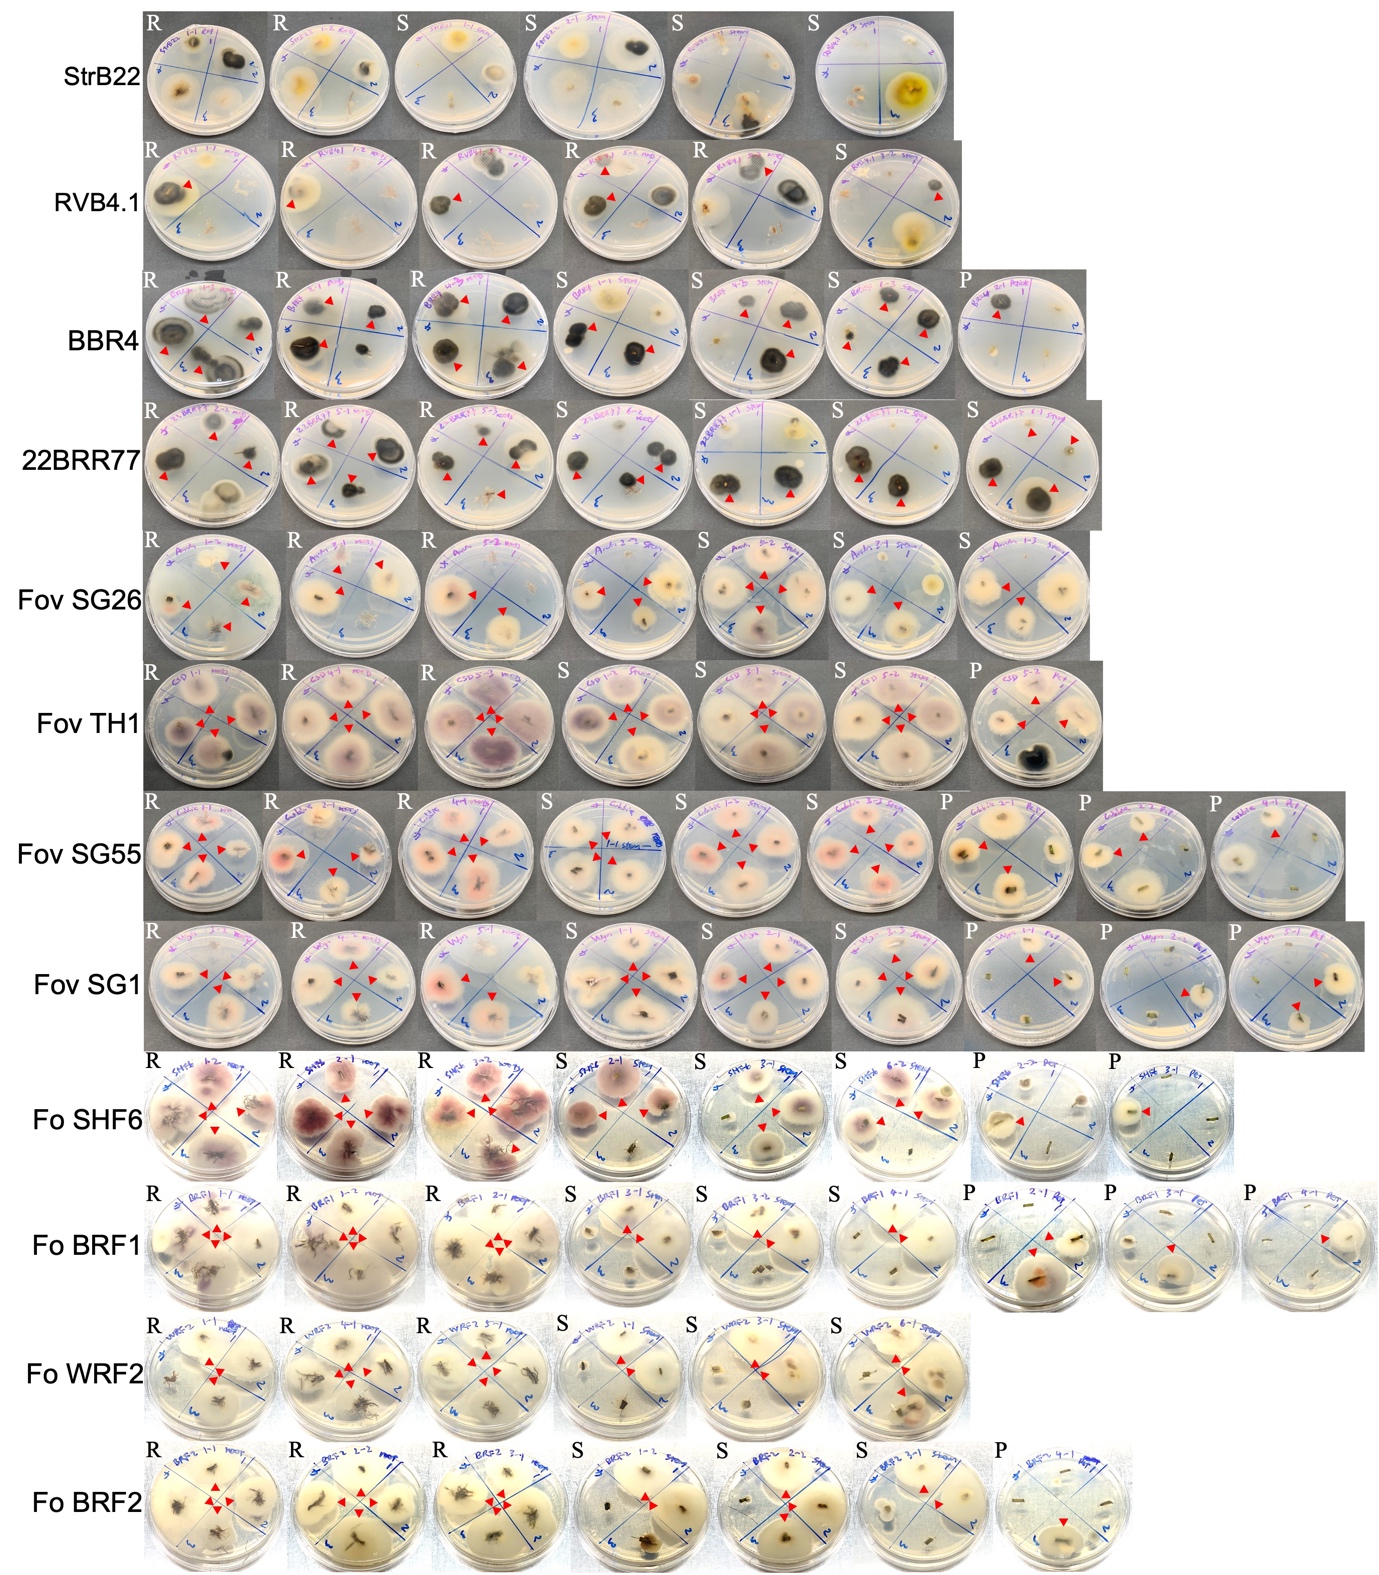


**Figure S8.** Reisolation of the *Berkeleyomyces rouxiae* and *Fusarium oxysporum* isolates from cotton plants on half-strength PDA plates (reverse view). Red arrows indicate *B. rouxiae* and *F. oxysporum* morphology positively identified under a compound microscope. R = roots; S = stem; P = petiole.


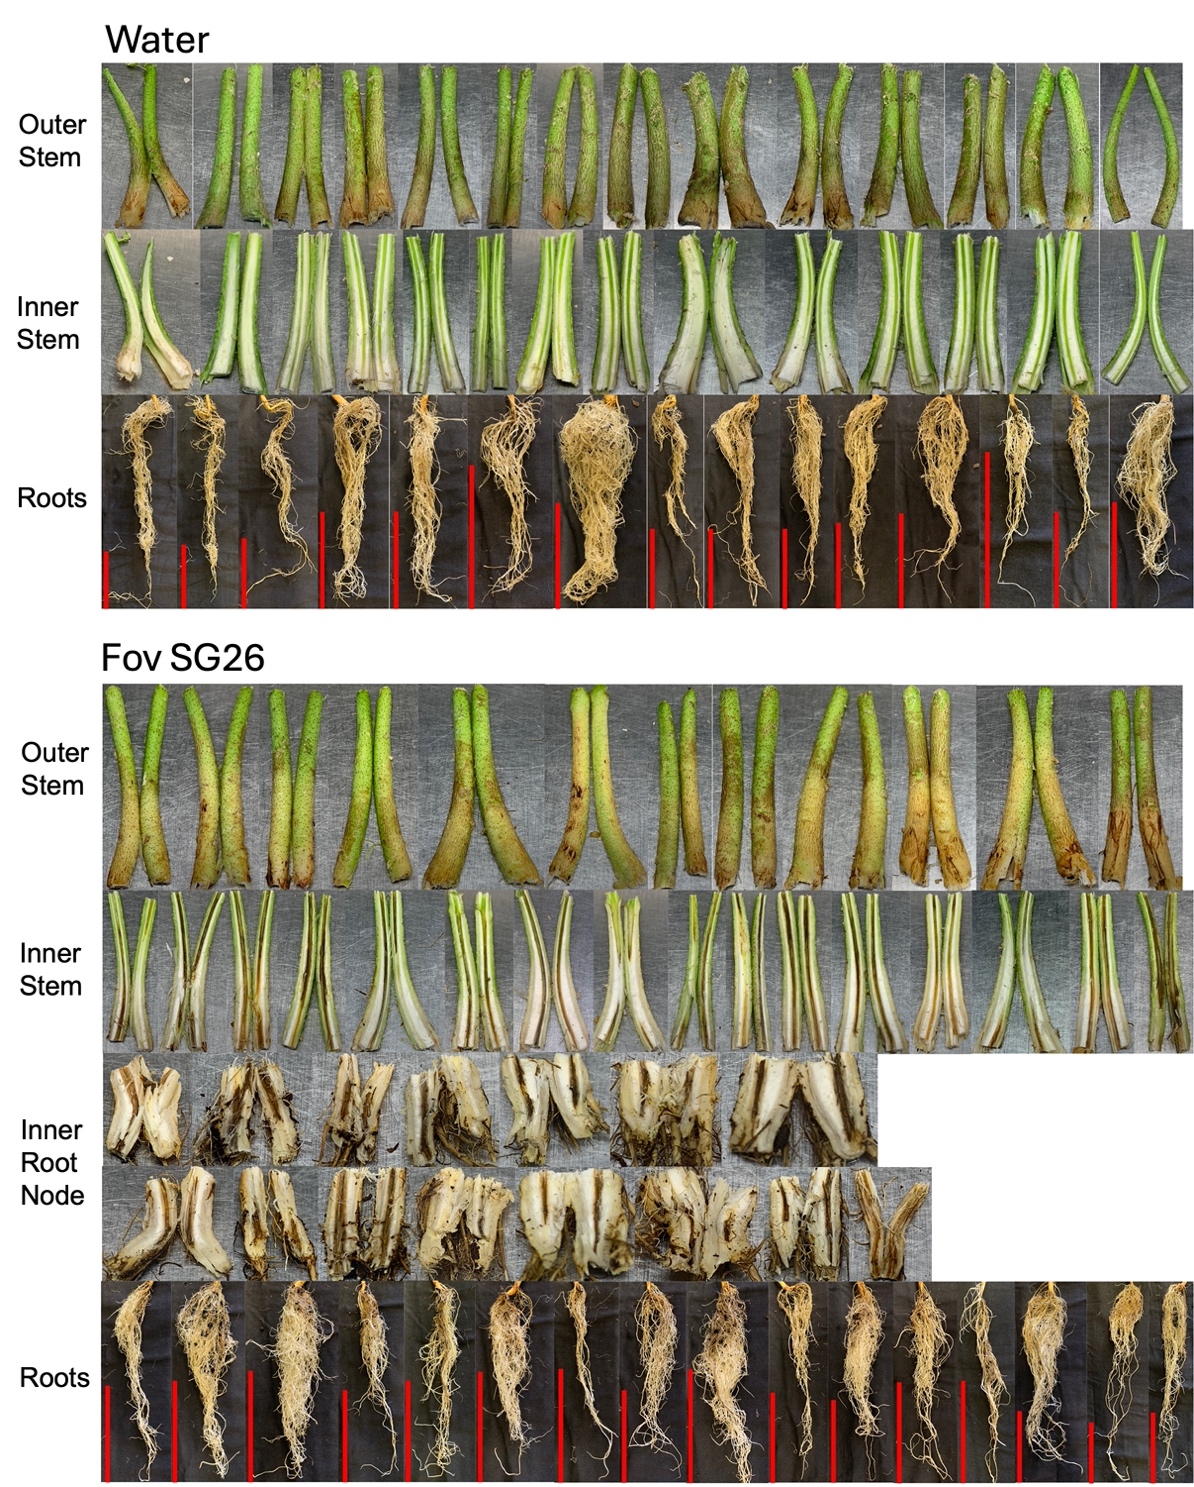


**Figure S9.** Symptomatology of Sicot746 B3F seedlings inoculated with *Fusarium oxysporum* f. sp. *vasinfectum* at harvest (27 — 34 days post inoculation). Uninoculated controls and Plants inoculated with Fov SG26 are shown. Red vertical bars indicate a scale of 10 cm.


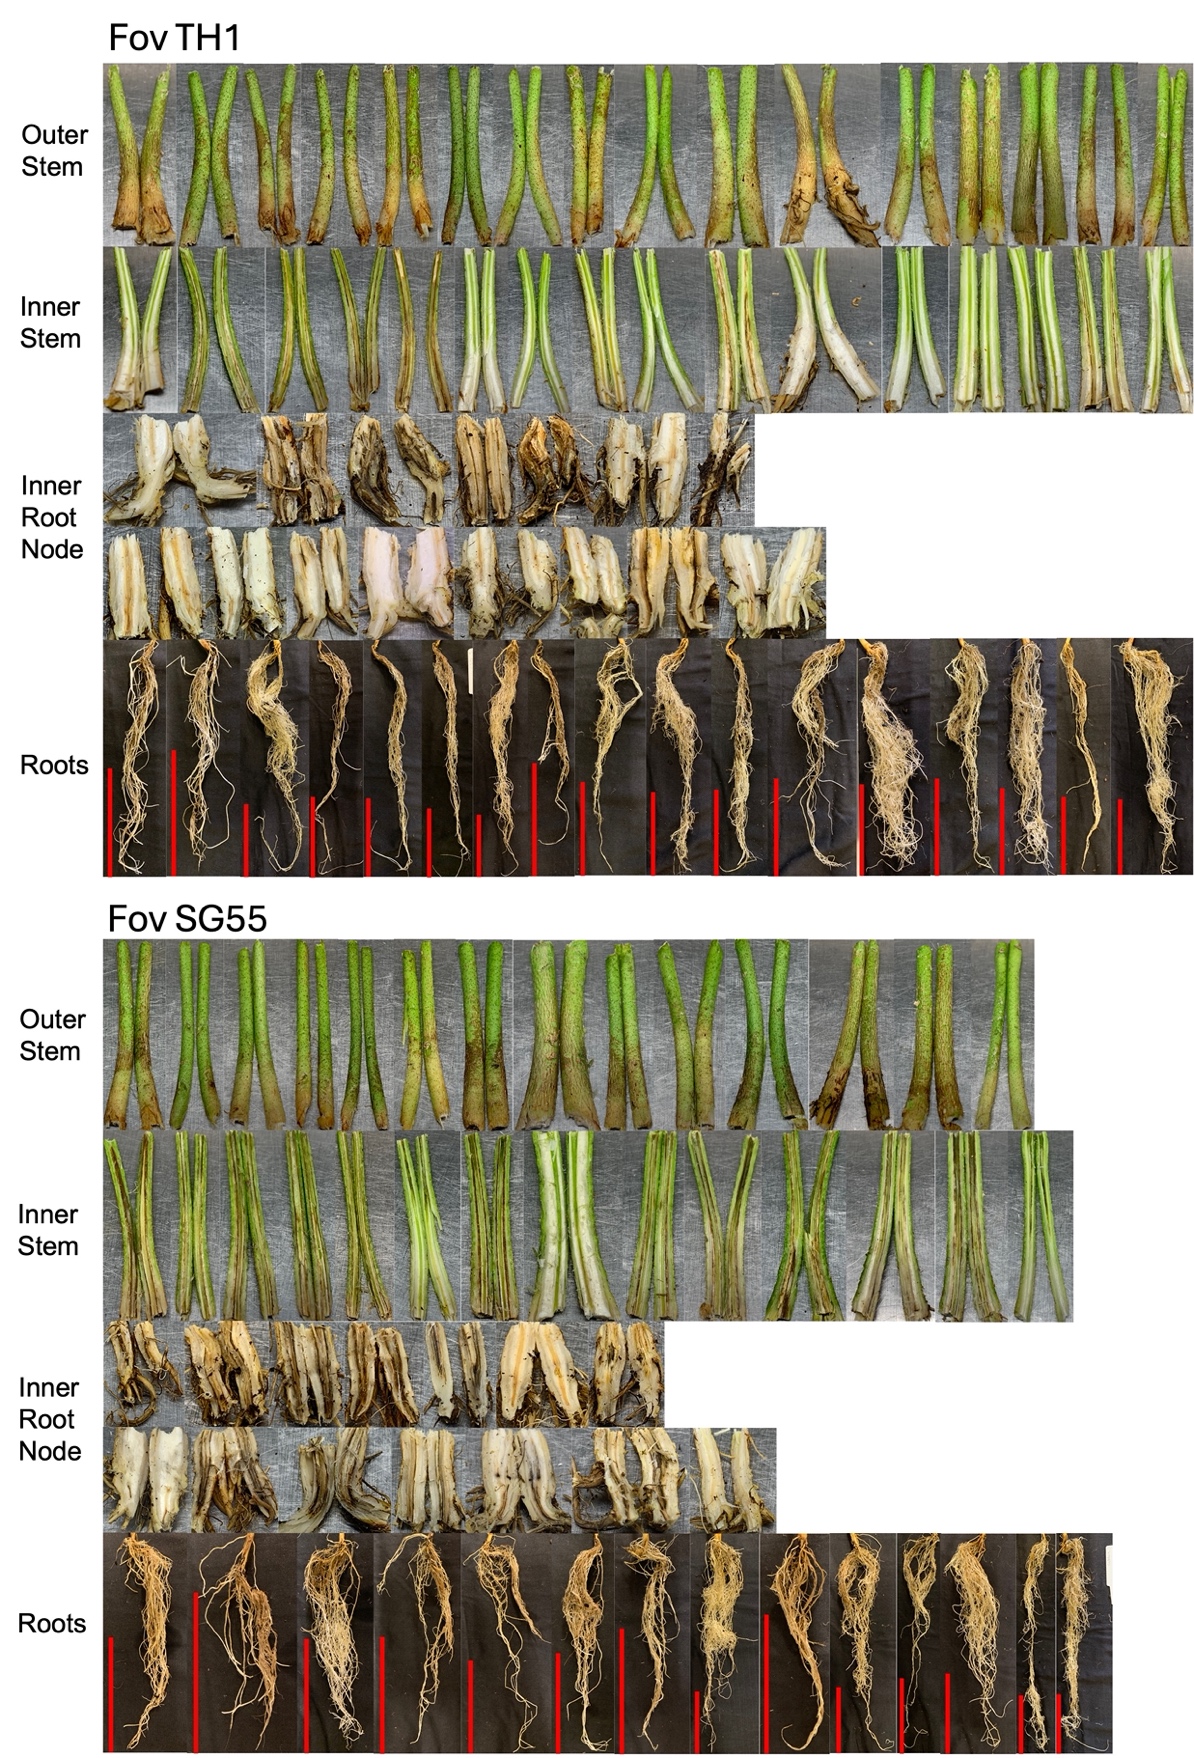


**Figure S10.** Symptomatology of Sicot746 B3F seedlings inoculated with *Fusarium oxysporum* f. sp. *vasinfectum* at harvest (27 — 34 days post inoculation). Plants inoculated with Fov TH1 and Fov SG55 are shown. Red vertical bars indicate a scale of 10 cm.


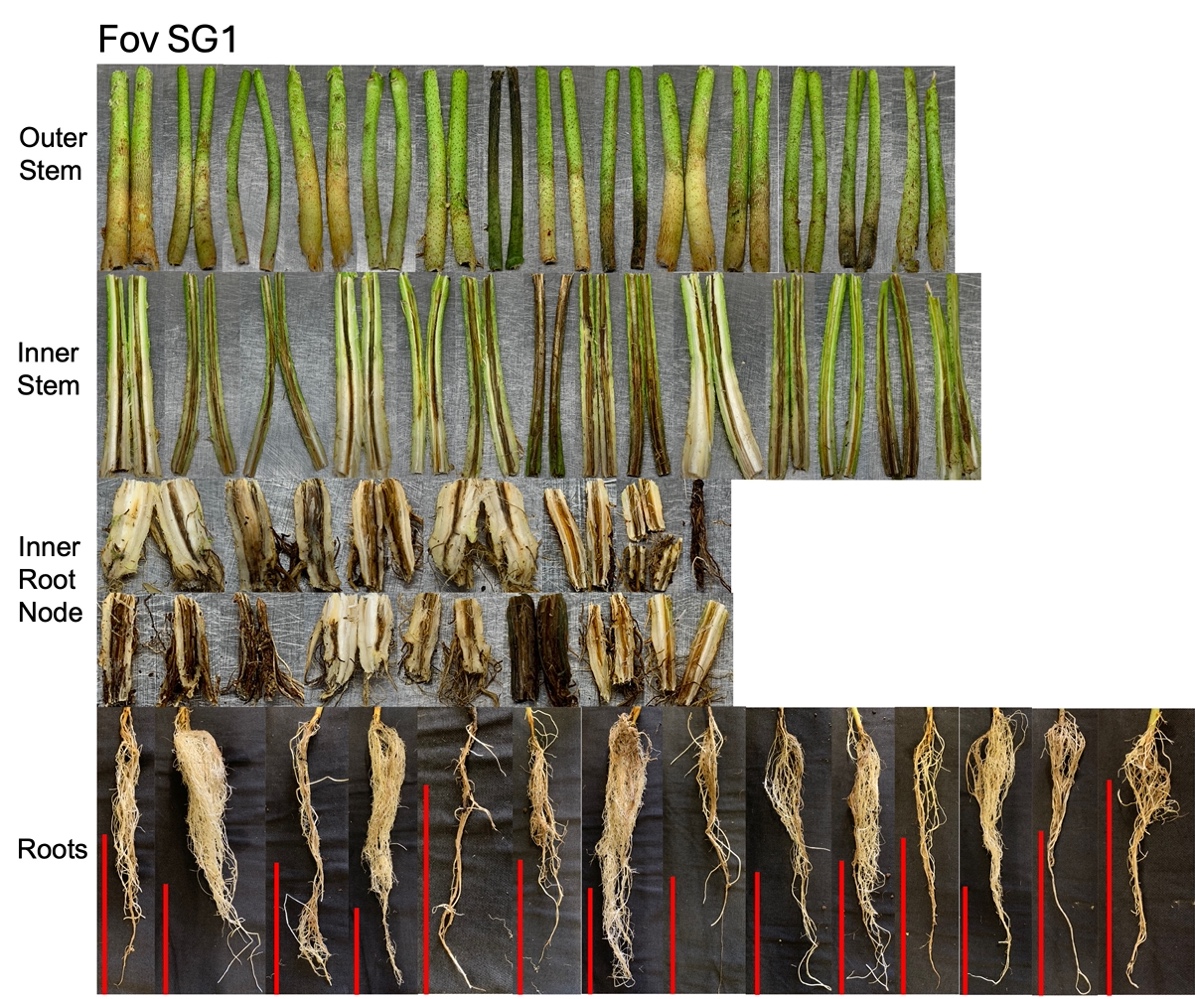


**Figure S11.** Symptomatology of Sicot746 B3F seedlings inoculated with *Fusarium oxysporum* f. sp. *vasinfectum* at harvest (27 — 34 days post inoculation). Plants inoculated with Fov SG1 are shown. Red vertical bars indicate a scale of 10 cm.


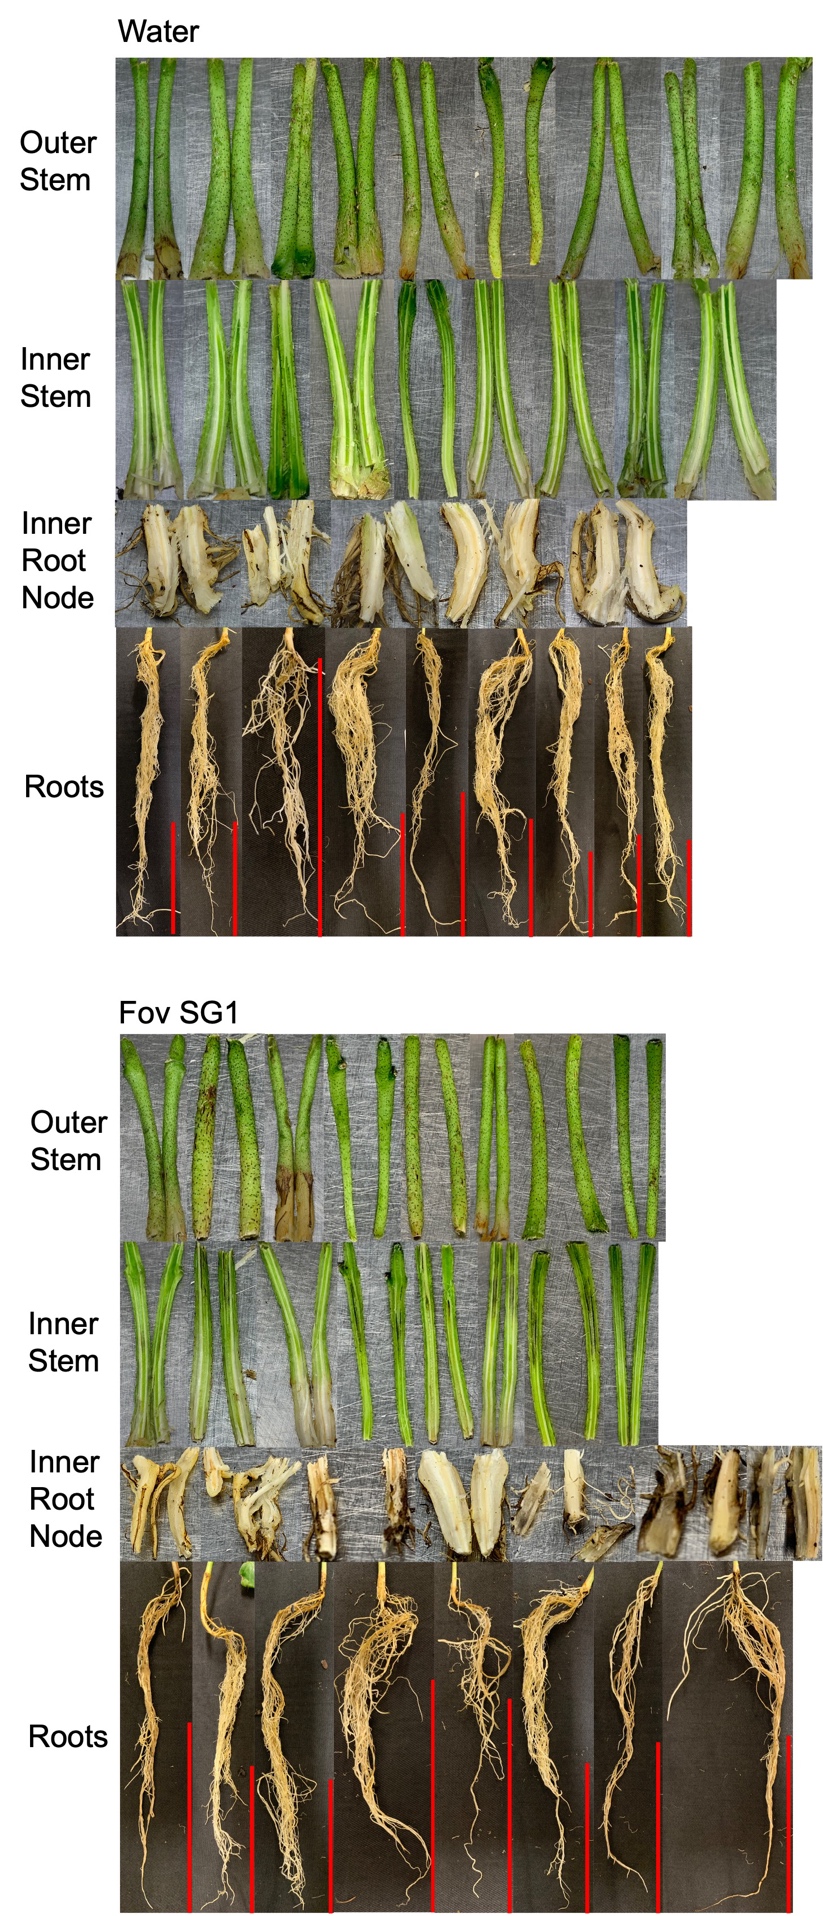


**Figure S12.** Symptomatology of Sicot746 B3F seedlings inoculated with *Fusarium oxysporum* spp.at harvest (17 — 22 days post inoculation). Uninoculated plants and plants inoculated with Fov SG1 (positive controls) are shown. Red vertical bars indicate a scale of 10 cm.


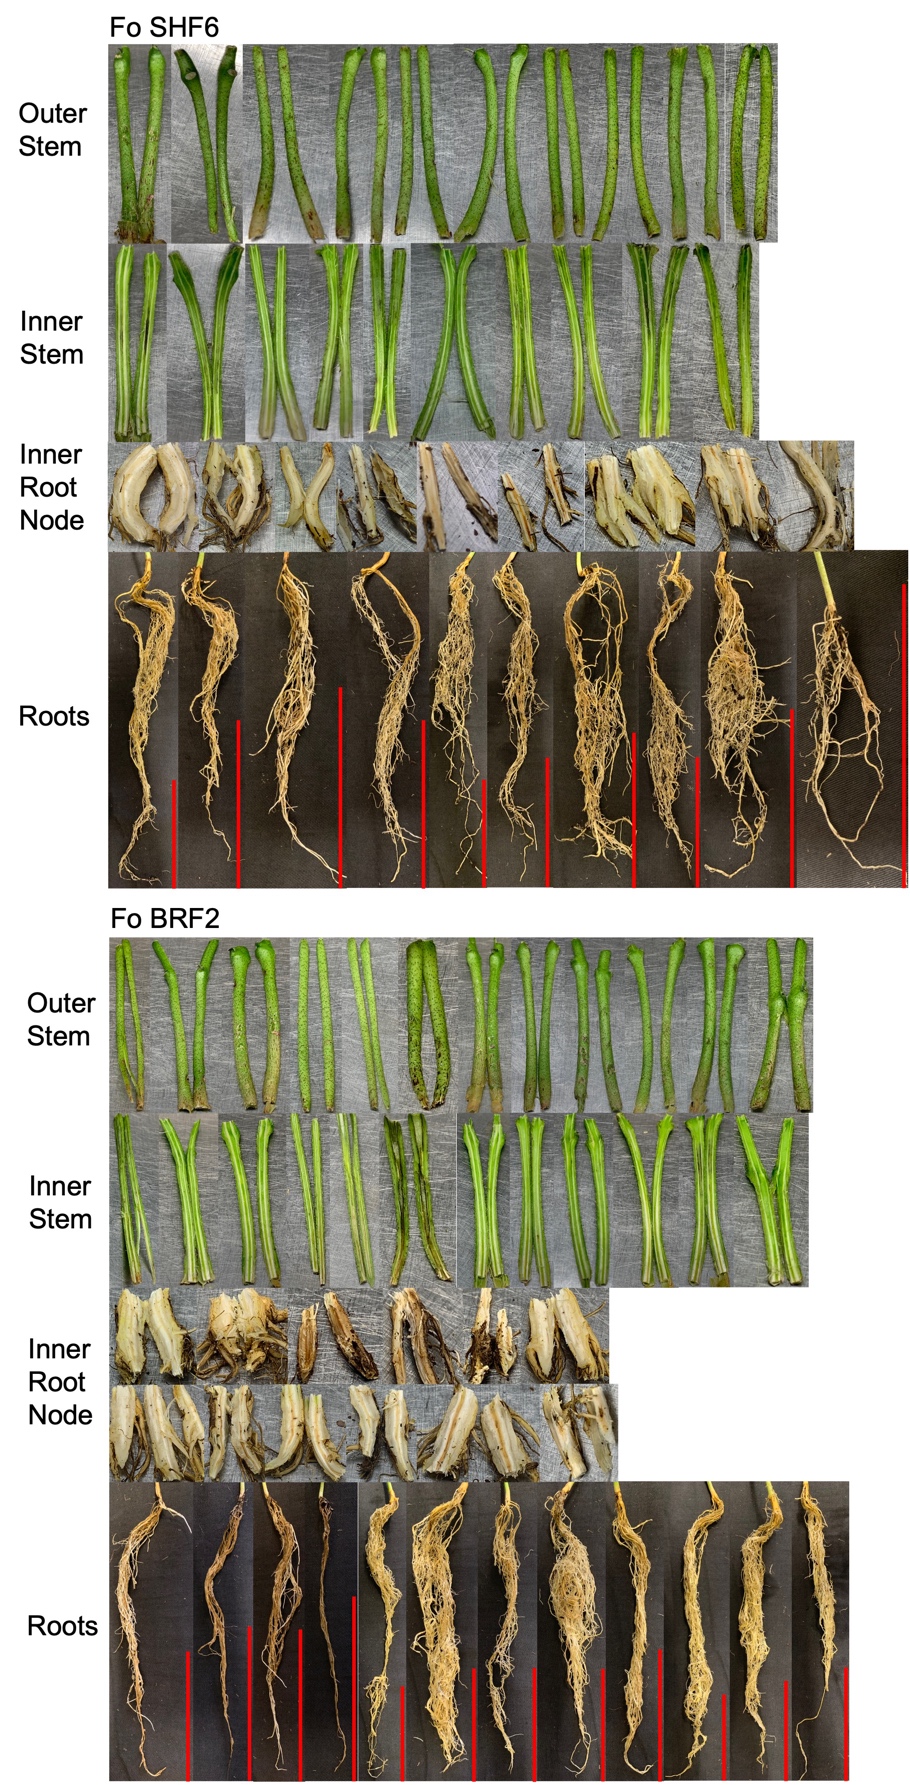


**Figure S13.** Symptomatology of Sicot746 B3F seedlings inoculated with *Fusarium oxysporum* spp.at harvest (17 — 22 days post inoculation). Plants inoculated with Fo SHF6 and Fo BRF2 are shown. Red vertical bars indicate a scale of 10 cm.


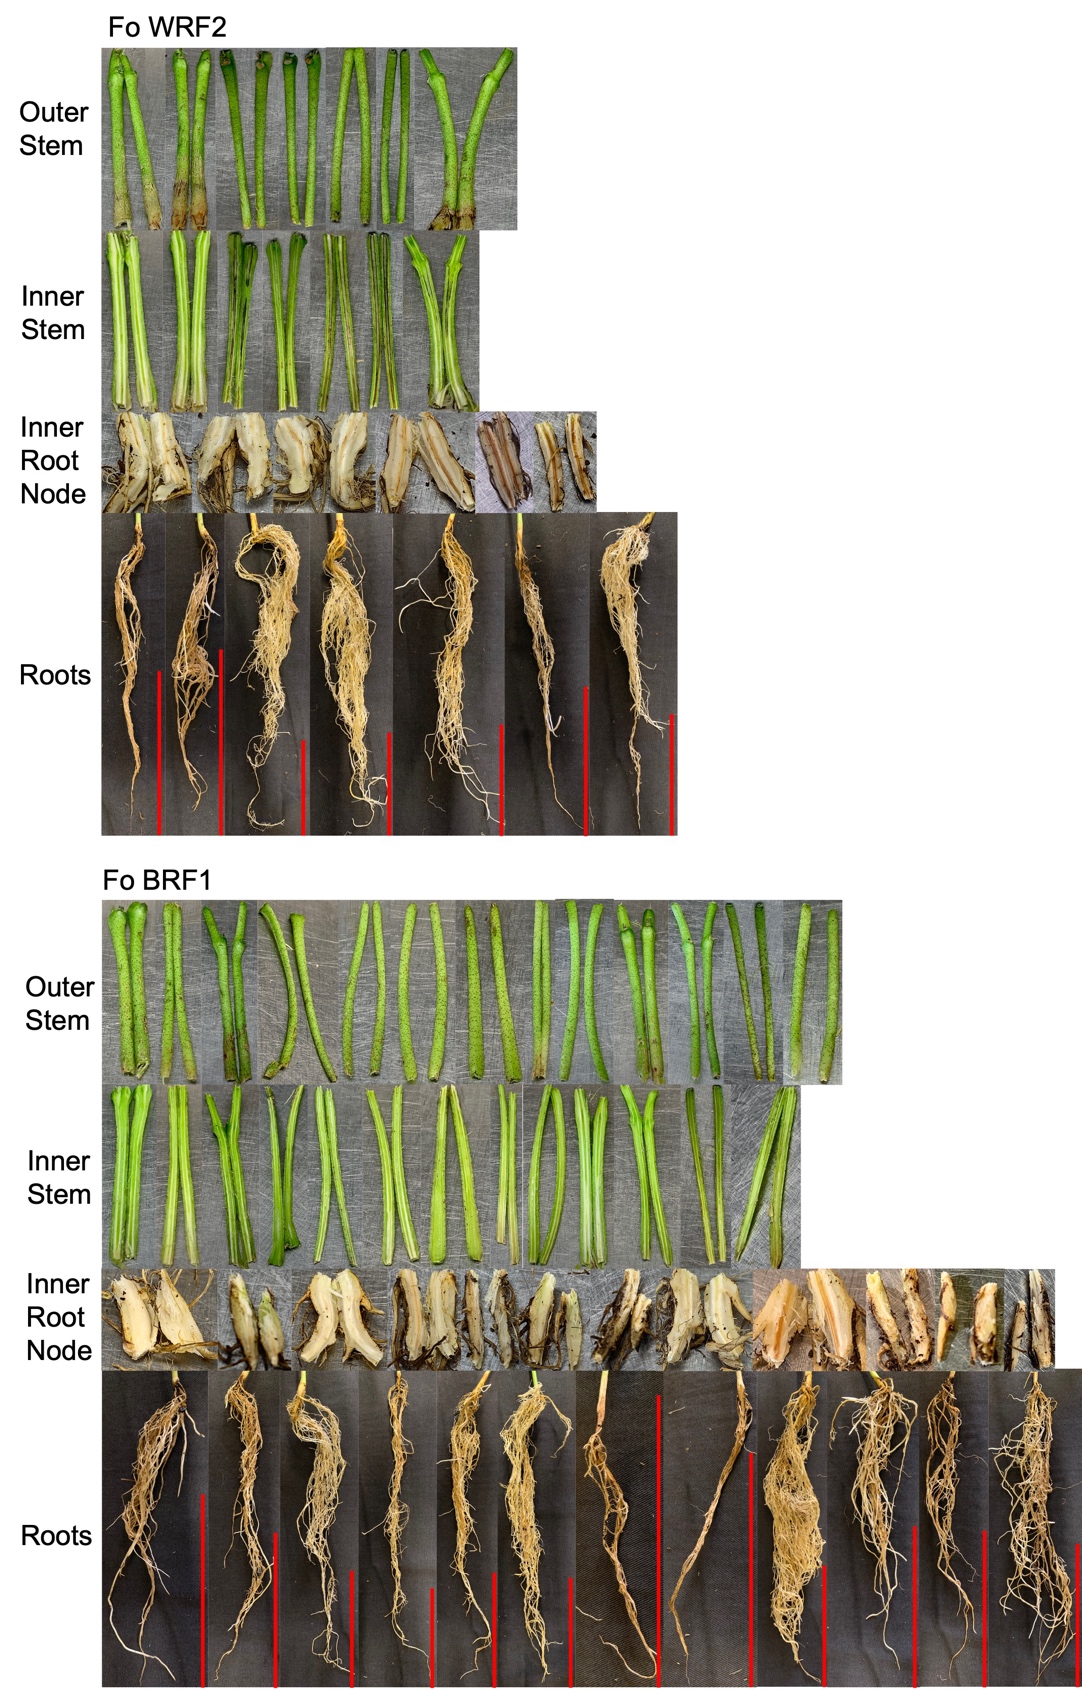


**Figure S14.** Symptomatology of Sicot746 B3F seedlings inoculated with *Fusarium oxysporum* spp.at harvest (17 — 22 days post inoculation). Plants inoculated with Fo WRF2 and Fo BRF1 are shown. Red vertical bars indicate a scale of 10 cm.
